# Supplementary material for: Influence of Zooplankton and Environmental Factors on Clear-Water Phase in Lake Paldang, South Korea
Source: MDPI journal article supplement (doi:10.3390/ijerph18137205), 2021-07-05
Supplement: s1 [file s1]

## **Supplementary Materials**

**Influence of Zooplankton and Environmental Factors on Clear Water Phase in Lake Paldang,  
South Korea**

**Table S1.** Correlation matrix showing coefficients between factors affecting the clear water phase in Lake Paldang.

| Variables     | TO-Ind   | RO-Ind   | CL-Ind   | CO-Ind   | RO-RA    | CL-RA    | CO-RA   | Chl- <i>a</i> | SD       | TUR      | Temp     | TN       | TP       | HRT      | PRECI |
|---------------|----------|----------|----------|----------|----------|----------|---------|---------------|----------|----------|----------|----------|----------|----------|-------|
| TO-Ind        | 1        |          |          |          |          |          |         |               |          |          |          |          |          |          |       |
| RO-Ind        | 0.916**  | 1        |          |          |          |          |         |               |          |          |          |          |          |          |       |
| CL-Ind        | 0.407**  | 0.142**  | 1        |          |          |          |         |               |          |          |          |          |          |          |       |
| CO-Ind        | 0.504**  | 0.201**  | 0.452**  | 1        |          |          |         |               |          |          |          |          |          |          |       |
| RO-RA         | 0.154**  | 0.367**  | -0.392** | -0.402** | 1        |          |         |               |          |          |          |          |          |          |       |
| CL-RA         | -0.036   | -0.220** | 0.594**  | 0.179**  | -0.670** | 1        |         |               |          |          |          |          |          |          |       |
| CO-RA         | -0.156** | -0.307** | 0.100*   | 0.422**  | -0.770** | 0.102*   | 1       |               |          |          |          |          |          |          |       |
| Chl- <i>a</i> | 0.186**  | 0.167**  | 0.011    | 0.203**  | 0.038    | -0.124*  | 0.076   | 1             |          |          |          |          |          |          |       |
| SD            | -0.112*  | -0.162** | 0.154**  | -0.037   | -0.202** | 0.330**  | 0.008   | -0.468**      | 1        |          |          |          |          |          |       |
| TUR           | -0.034   | -0.063   | -0.039   | 0.151**  | -0.154** | 0.070    | 0.106*  | 0.208**       | -0.497** | 1        |          |          |          |          |       |
| Temp          | 0.154**  | 0.088    | 0.289**  | 0.185**  | -0.144** | 0.250**  | 0.000   | 0.207**       | 0.050    | 0.137**  | 1        |          |          |          |       |
| TN            | 0.015    | 0.071    | -0.221** | -0.116*  | 0.244**  | -0.311** | -0.090  | 0.111*        | -0.438** | 0.161**  | -0.534** | 1        |          |          |       |
| TP            | 0.008    | -0.002   | 0.004    | 0.043    | -0.014   | -0.042   | 0.053   | 0.389**       | -0.567** | 0.764**  | 0.161**  | 0.343**  | 1        |          |       |
| HRT           | -0.015   | -0.052   | 0.089    | 0.121*   | -0.189** | 0.112*   | 0.177** | -0.061        | 0.330**  | -0.231** | -0.182** | -0.403** | -0.331** | 1        |       |
| PRECI         | -0.082   | -0.070   | 0.016    | -0.070   | -0.024   | 0.081    | -0.041  | 0.058         | -0.377** | 0.684**  | 0.199**  | 0.118*   | 0.662**  | -0.371** | 1     |

\*  $p < 0.05$ , \*\*  $p < 0.01$ . TO: total; RO: Rotifera; CL: Cladocera; CO: Copepoda; Chl-*a*: chlorophyll-*a*; SD: secchi depth; TUR: turbidity; Temp: water temperature; TN: total nitrogen; TP: total phosphorus; HRT: hydraulic retention time; Ind: individuals; RA: relative abundance; PRECI: precipitation.
